# Supplementary material for: Digital Rehabilitation for Elbow Pain Musculoskeletal Conditions: A Prospective Longitudinal Cohort Study
Source: MDPI journal article supplement (doi:10.3390/ijerph19159198), 2022-07-27
Supplement: s1 [file s1]

## Digital rehabilitation for elbow pain musculoskeletal conditions: a prospective longitudinal cohort study

Dora Janela, Fabíola Costa, Maria Molinos, Robert G. Moulder, Jorge Lains, Virgílio Bento, Justin K Scheer, Vijay Yanamadala, Steven P. Cohen, Fernando Dias Correia

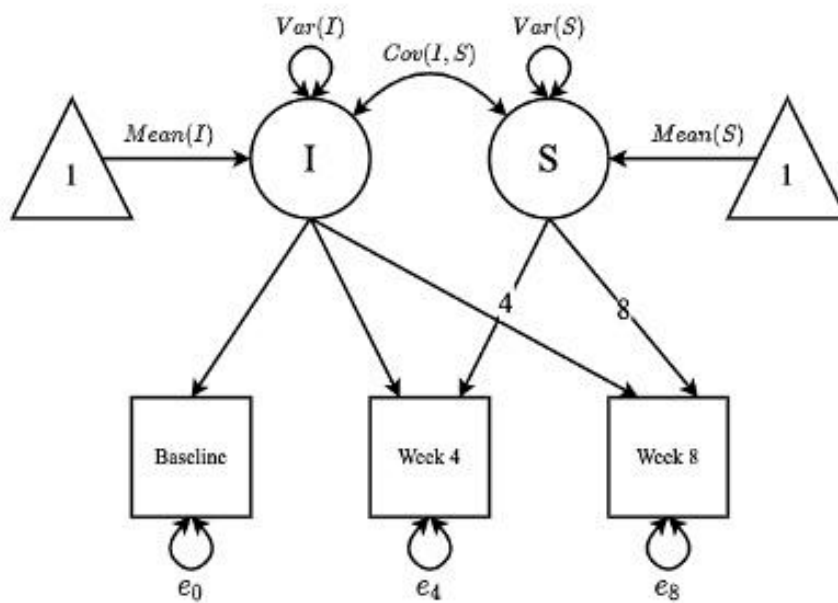

**Supplementary Figure S1.** Example path diagram for the LGC models used in the current study. LGCs are a form of structural equation model for modeling longitudinal processes. Squares represent outcome variables at baseline, 4 weeks, and 8 weeks. Circles represent average latent intercept (I), and slope (S) components across all participants. Single-headed arrows represent fixed loadings relating the outcome variables to the latent components. Double-headed arrows represent either variance, or covariance.

Latent growth curve (LGC) models take the form:

$$Y_{ij} = I + St_i + u_{ij} + u_{sj}t_i + e_{ij}$$

where  $Y$  is the outcome score for person,  $j$ , at time,  $i$ ,  $t_i$  is a vector of time points representing [0, 4, 8] weeks,  $I$  is an intercept term representing the average value at  $t=0$  for all participants,  $S$  is a slope term representing the average linear change of  $Y_{ij}$  over time for all participants,  $u_{ij}$  is a random intercept term representing individual participant variation in  $I$ ,  $u_{sj}$  is a random slope term representing individual participant variation in  $S$ , and  $e_{ij}$  is an error term.

**Supplementary Table S1.** Baseline characteristics of completers vs non-completers.

| Characteristic                        | Completers<br>(N=112) | Non-completers<br>(N=20) | p               |
|---------------------------------------|-----------------------|--------------------------|-----------------|
| Age (years), mean (SD)                | 51.5 (9.9)            | 50.1 (9.7)               | 0.284           |
| Age categories, N (%):                |                       |                          | 0.343           |
| <25                                   | 0 (0.0)               | 0 (0.0)                  |                 |
| 25-40                                 | 15 (13.4)             | 5 (25.0)                 |                 |
| 40-60                                 | 78 (69.6)             | 11 (55.0)                |                 |
| > 60                                  | 19 (17.0)             | 4 (20.0)                 |                 |
| Sex, N (%):                           |                       |                          | 0.941           |
| Female                                | 57 (50.9)             | 10 (50.0)                |                 |
| Male                                  | 55 (49.1)             | 10 (50.0)                |                 |
| BMI, mean (SD)                        | 27.0 (5.5)            | 26.0 (4.4)               | 0.224           |
| BMI categories, N (%):                |                       |                          | 0.822           |
| Underweight (<18.5)                   | 0 (0.0)               | 0 (0.0)                  |                 |
| Normal (18.5-25)                      | 53 (47.3)             | 9 (45.0)                 |                 |
| Overweight (25-30)                    | 31 (27.7)             | 7 (35.0)                 |                 |
| Obese (30-40)                         | 25 (22.3)             | 4 (20.0)                 |                 |
| Morbidly obese (>40)                  | 3 (2.7)               | 0 (0.0)                  |                 |
| Employment status, N (%):             |                       |                          | 0.726           |
| Employed (part-time or full-time)     | 104 (92.9)            | 19 (95.0)                |                 |
| Unemployed                            | 8 (7.1)               | 1 (5.0)                  |                 |
| Occupation type, N (%):               |                       |                          | 0.379           |
| White collar                          | 59 (52.7)             | 9 (45.0)                 |                 |
| Blue collar                           | 31 (27.7)             | 9 (45.0)                 |                 |
| Other (e.g. retired)                  | 17 (15.2)             | 2 (10.0)                 |                 |
| Not available                         | 5 (4.5)               | 0 (0.0)                  |                 |
| Laterality, N (%):                    |                       |                          | 0.752           |
| Right                                 | 76 (67.9)             | 12 (60.0)                |                 |
| Left                                  | 30 (26.8)             | 7 (35.0)                 |                 |
| Bilateral                             | 6 (5.4)               | 1 (5.0)                  |                 |
| Elbow pain-related condition, N (%):  |                       |                          | <b>.014</b>     |
| Tendinopathies                        | 86 (76.9)             | 14 (70.0)                |                 |
| Lateral elbow tendinopathy            | 61 (54.5)             | 5 (25.0)                 |                 |
| Medial elbow tendinopathy             | 19 (17.0)             | 7 (35.0)                 |                 |
| Other tendinopathies                  | 6 (5.4)               | 2 (10.0)                 |                 |
| Elbow pain after non-traumatic injury | 9 (8.0)               | 0 (0.0)                  |                 |
| Elbow pain after traumatic injury     | 6 (5.4)               | 0 (0.0)                  |                 |
| Distal nerve entrapment neuropathy    | 8 (7.1)               | 3 (15.0)                 |                 |
| Non-specific                          | 3 (2.7)               | 3 (15.0)                 |                 |
| Pain duration, N (%):                 |                       |                          | .658            |
| Acute (<12 weeks)                     | 62 (55.4)             | 10 (50.0)                |                 |
| 0-4 weeks                             | 11 (9.8)              | 1 (5.0)                  |                 |
| 4-12 weeks                            | 51 (45.6)             | 9 (45)                   |                 |
| Chronic (>12 weeks)                   | 50 (44.6)             | 10 (50.0)                |                 |
| <6 months                             | 22 (19.6)             | 7 (35.0)                 |                 |
| 6-12 months                           | 17 (15.2)             | 2 (10.0)                 |                 |
| ≥1 year                               | 11 (9.8)              | 1 (5.0)                  |                 |
| <b>Outcome measures, mean (SD)</b>    |                       |                          |                 |
| Pain Level                            | 4.5 (1.8)             | 4.4 (1.9)                | 0.455           |
| QuickDASH                             | 25.9 (13.6)           | 23.1 (14.6)              | 0.198           |
| Analgesics, N (%)                     | 34 (30.4)             | 7 (35.0)                 | 0.679           |
| Surgery Intent                        | 5.7 (12.2)            | 4.7 (11.8)               | 0.364           |
| FABQ-PA                               | 12.3 (5.7)            | 13.7 (4.9)               | 0.147           |
| GAD-7                                 | 1.8 (2.9)             | 1.6 (3.2)                | 0.411           |
| PHQ-9                                 | 2.0 (3.4)             | 1.2 (1.5)                | <b>0.041</b>    |
| WPAI Overall                          | 12.2 (20.4)           | 3.4 (7.5)                | <b>&lt;.001</b> |
| WPAI Work                             | 10.6 (17.3)           | 3.4 (7.5)                | 0.002           |
| WPAI Time                             | 1.9 (11.5)            | 0.0 (0.0)                | 0.235           |
| WPAI Activities                       | 25.2 (21.1)           | 19.5 (20.4)              | 0.134           |

**Abbreviations:** BMI, Body mass index; QuickDASH, Quick Disabilities of the Arm, Shoulder and Hand questionnaire; FABQ-PA, Fear-Avoidance Beliefs Questionnaire for physical activity; GAD-7, Generalized Anxiety Disorder 7-item scale; PHQ-9, Patient Health 9-item questionnaire; WPAI, Work Productivity and Activity Impairment questionnaire. Note: Significant p-values are presented in bol

**Supplementary Table S2.** Unconditional Latent Growth Curve analysis: intent-to-treat.

| Outcome           | N   | Intercept     |              | Slope        |              | Fit         |              |              |             |              |
|-------------------|-----|---------------|--------------|--------------|--------------|-------------|--------------|--------------|-------------|--------------|
|                   |     | Mean (SD)     | <i>p</i>     | Mean (SD)    | <i>p</i>     | Chi-sq (df) | <i>p</i>     | RMSEA        | CFI         | SRMR         |
| QuickDASH         | 130 | 24.48 (10.79) | < .001       | -1.49 (0.57) | < .001       | 10.82 (1)   | 0.001        | 0.273        | <b>0.92</b> | 0.062        |
| Pain Level        | 132 | 4.27 (0.78)   | < .001       | -0.28 (0.03) | < .001       | 15.06 (1)   | < .001       | 0.326        | 0.47        | 0.113        |
| Surgery Intent >0 | 50  | 7.58 (0.03)   | <b>0.002</b> | -0.54 (0.03) | <b>0.032</b> | 20.49 (1)   | < .001       | 0.624        | 0.00        | 0.236        |
| Surgery Intent    | 132 | 3.70 (5.26)   | < .001       | -0.30 (0.03) | <b>0.002</b> | 16.41 (1)   | < .001       | 0.342        | 0.63        | 0.134        |
| FABQ-PA           | 132 | 12.21 (3.52)  | < .001       | -0.52 (0.19) | < .001       | 4.52 (1)    | 0.034        | 0.163        | <b>0.96</b> | <b>0.049</b> |
| GAD-7 ≥5          | 16  | 8.12 (3.52)   | < .001       | -0.61 (0.03) | < .001       | 6.58 (1)    | 0.010        | 0.591        | 0.40        | 0.222        |
| GAD-7             | 132 | 1.87 (2.21)   | < .001       | -0.07 (0.11) | <b>0.013</b> | 0.9 (1)     | <b>0.343</b> | <b>0.000</b> | <b>1.00</b> | <b>0.018</b> |
| PHQ-9 ≥5          | 19  | 8.36 (0.03)   | < .001       | -0.72 (0.39) | < .001       | 1.4 (1)     | <b>0.237</b> | 0.144        | 0.84        | 0.120        |
| PHQ-9             | 132 | 1.86 (2.93)   | < .001       | -0.11 (0.40) | <b>0.004</b> | 1.11 (1)    | <b>0.292</b> | <b>0.029</b> | <b>1.00</b> | <b>0.018</b> |
| WPAI Overall >0   | 46  | 26.14 (20.06) | < .001       | -2.36 (2.71) | < .001       | 16.06 (1)   | < .001       | 0.572        | 0.19        | 0.246        |
| WPAI Overall      | 117 | 7.74 (12.26)  | < .001       | -0.50 (1.01) | <b>0.004</b> | 7.86 (1)    | 0.005        | 0.235        | 0.87        | 0.066        |
| WPAI Work >0      | 45  | 24.34 (17.29) | < .001       | -2.30 (2.33) | < .001       | 11.71 (1)   | < .001       | 0.488        | 0.32        | 0.209        |
| WPAI Work         | 117 | 7.50 (10.80)  | < .001       | -0.52 (0.86) | < .001       | 5.81 (1)    | 0.016        | 0.197        | <b>0.90</b> | 0.058        |
| WPAI Activity >0  | 104 | 30.08 (16.21) | < .001       | -2.54 (1.44) | < .001       | 10.31 (1)   | 0.001        | 0.299        | 0.78        | 0.100        |
| WPAI Activity     | 132 | 23.03 (16.22) | < .001       | -1.78 (1.34) | < .001       | 7.61 (1)    | 0.006        | 0.224        | 0.89        | 0.066        |

Note: Significant p-values are presented in bold. Trajectories were calculated through intercept (i.e., initial estimated value at baseline), and slope (i.e. linear outcome change per week) for each variable.

**Supplementary Table S3.** Intent-to-treat Conditional Latent Growth Curve Model, with body mass index, age, sex and acuity as covariates.

| Outcome              | Age                 |                          | Female                                   |                          | BMI                      |                  | Chronic                  |                  | Chi-sq<br>(df) | p            | FIT          |             |              |
|----------------------|---------------------|--------------------------|------------------------------------------|--------------------------|--------------------------|------------------|--------------------------|------------------|----------------|--------------|--------------|-------------|--------------|
|                      | Intercept           | Slope                    | Intercept                                | Slope                    | Intercept                | Slope            | Intercept                | Slope            |                |              | RMSEA        | CFI         | SRMR         |
| Quickdash            | <b>0.26 (0.023)</b> | -0.02<br>(0.072)         | <b>8.90<br/>(<math>&lt; .001</math>)</b> | <b>-0.59<br/>(0.036)</b> | 0.29 (0.175)             | -0.01<br>(0.774) | 0.60 (0.777)             | -0.26<br>(0.365) | 13.58 (4)      | 0.009        | 0.135        | <b>0.93</b> | <b>0.04</b>  |
| Pain Level           | 0.03 (0.088)        | 0<br>(0.053)             | 0.55 (0.057)                             | <b>-0.10<br/>(0.034)</b> | -0.01<br>(0.609)         | 0<br>(0.626)     | 0.08 (0.775)             | 0.02<br>(0.731)  | 22.07 (4)      | $< .001$     | 0.185        | 0.46        | 0.076        |
| Surgery Intent<br>>0 | -0.01<br>(0.948)    | 0<br>(0.853)             | -0.85<br>(0.780)                         | -0.18<br>(0.662)         | 0.16 (0.546)             | -0.03<br>(0.447) | -1.20<br>(0.670)         | 0.23<br>(0.468)  | 25.63 (4)      | $< .001$     | 0.329        | 0.00        | 0.159        |
| Surgery Intent       | -0.01<br>(0.935)    | 0<br>(0.741)             | -2.16<br>(0.151)                         | 0.2 (0.269)              | -0.01<br>(0.881)         | 0<br>(0.751)     | -1.18<br>(0.418)         | 0.24<br>(0.182)  | 18.56 (4)      | $< .001$     | 0.166        | 0.61        | 0.084        |
| FABQ-PA              | -0.01<br>(0.783)    | 0<br>(0.893)             | 0.55 (0.559)                             | -0.03<br>(0.800)         | -0.02<br>(0.773)         | 0.01<br>(0.457)  | 0.63 (0.513)             | 0.15<br>(0.291)  | 8.96 (4)       | <b>0.062</b> | 0.097        | <b>0.93</b> | <b>0.038</b> |
| GAD-7 $\geq 5$       | -0.02<br>(0.838)    | -0.02<br>(0.405)         | 1.67 (0.209)                             | -0.29<br>(0.257)         | <b>-0.29<br/>(0.004)</b> | 0.04<br>(0.052)  | 2.31 (0.117)             | 0.18<br>(0.309)  | 18.41 (4)      | 0.001        | 0.474        | 0.31        | 0.259        |
| GAD-7                | 0<br>(0.944)        | 0<br>(0.327)             | <b>0.98 (0.043)</b>                      | -0.06<br>(0.325)         | -0.01<br>(0.883)         | 0<br>(0.704)     | 0.87 (0.077)             | -0.10<br>(0.108) | 2.83 (4)       | <b>0.587</b> | <b>0.000</b> | <b>1.00</b> | <b>0.017</b> |
| PHQ-9 $\geq 5$       | 0.07 (0.429)        | 0<br>(0.966)             | 1.95 (0.157)                             | -0.16<br>(0.516)         | -0.06<br>(0.759)         | 0<br>(0.900)     | -1.18<br>(0.376)         | 0.39<br>(0.218)  | 6.64 (4)       | <b>0.156</b> | 0.186        | 0.03        | 0.107        |
| PHQ-9                | 0<br>(0.874)        | 0<br>(0.733)             | 0.36 (0.527)                             | 0.05<br>(0.564)          | 0.05 (0.293)             | 0<br>(0.825)     | -0.25<br>(0.642)         | -0.02<br>(0.767) | 8.88 (4)       | <b>0.064</b> | 0.096        | <b>0.95</b> | <b>0.034</b> |
| WPAI Overall >0      | <b>0.71 (0.012)</b> | <b>-0.17<br/>(0.006)</b> | -1.19<br>(0.847)                         | 1.31<br>(0.181)          | 0.86 (0.096)             | -0.06<br>(0.313) | -9.74<br>(0.056)         | 0.69<br>(0.354)  | 17.9 (4)       | 0.001        | 0.275        | 0.53        | 0.147        |
| WPAI Overall         | 0.16 (0.189)        | <b>-0.05<br/>(0.027)</b> | 1.98 (0.518)                             | 0.22<br>(0.556)          | 0.24 (0.322)             | -0.03<br>(0.273) | <b>-7.67<br/>(0.006)</b> | 0.55<br>(0.110)  | 11.92 (4)      | 0.018        | 0.122        | 0.87        | 0.046        |
| WPAI Work >0         | <b>0.48 (0.042)</b> | <b>-0.15<br/>(0.010)</b> | 2.34 (0.624)                             | 1.16<br>(0.158)          | 0.98 (0.053)             | -0.06<br>(0.314) | -5.88<br>(0.190)         | -0.01<br>(0.989) | 13.31 (4)      | 0.010        | 0.227        | 0.70        | 0.096        |
| WPAI Work            | 0.10<br>(0.340)     | <b>-0.04<br/>(0.044)</b> | 3.36 (0.255)                             | 0.10<br>(0.767)          | 0.32 (0.201)             | -0.04<br>(0.188) | -6.24<br>(0.015)         | 0.34<br>(0.310)  | 10.52 (4)      | <b>0.033</b> | 0.111        | 0.89        | <b>0.046</b> |
| WPAI Activity<br>>0  | 0<br>(0.990)        | -0.02<br>(0.525)         | 4.47 (0.201)                             | -0.58<br>(0.238)         | <b>1.07 (0.008)</b>      | -0.11<br>(0.072) | -9.74<br>(0.056)         | 0.69<br>(0.354)  | 10.9 (4)       | 0.028        | 0.129        | 0.85        | 0.062        |
| WPAI Activity        | -0.09<br>(0.528)    | 0<br>(0.868)             | 4.06 (0.249)                             | -0.52<br>(0.270)         | 0.60 (0.109)             | -0.08<br>(0.091) | -4.81<br>(0.164)         | -0.10<br>(0.846) | 8.64 (4)       | <b>0.071</b> | 0.094        | <b>0.92</b> | <b>0.043</b> |

*Note: Significant p-values are presented in bold. Trajectories were calculated through intercept (i.e., initial estimated value at baseline), and slope (i.e. linear outcome change per week) for each variable. If a significant chi-square is found for a model, then CFI values  $> .9$ , or RMSEA values  $< .08$ , or SRMR values  $< .05$  signify models with acceptable fit (presented in bold).*

**Supplementary Table S4.** A. Responder analysis for primary outcome (QuickDASH) considering an absolute MCIC of 12.0 and a relative MCIC of 30% of change; B. Association of baseline variables with odds of a successful outcome (responder).

A.

| MCIC | Responded | Did not Respond | Odds Ratio<br>(Responded) | 95% CI     | Probability<br>(Responded) | z     | p               |
|------|-----------|-----------------|---------------------------|------------|----------------------------|-------|-----------------|
| 30%  | 64        | 21              | 3.05                      | 1.90; 5.11 | 0.753                      | 4.43  | <b>&lt;.001</b> |
| 12.0 | 41        | 45              | 0.91                      | 0.59; 1.39 | 0.477                      | -0.43 | 0.666           |

B.

| Parameter                                                                                                                                   | OR being a responder | 95% CI     | z     | p            |
|---------------------------------------------------------------------------------------------------------------------------------------------|----------------------|------------|-------|--------------|
| <b>30% MCIC</b>                                                                                                                             |                      |            |       |              |
| Intercept                                                                                                                                   | 1.71                 | 1.35; 5.91 | 2.69  | <b>0.007</b> |
| Age                                                                                                                                         | 0.99                 | 0.94; 1.05 | -0.21 | 0.834        |
| BMI                                                                                                                                         | 0.98                 | 0.90; 1.08 | -0.42 | 0.677        |
| Female                                                                                                                                      | 1.26                 | 0.46; 3.41 | 0.45  | 0.651        |
| <b>12.0 MCIC</b>                                                                                                                            |                      |            |       |              |
| Intercept                                                                                                                                   | 0.44                 | 0.21; 0.87 | -2.29 | <b>0.022</b> |
| Age                                                                                                                                         | 1.04                 | 0.99; 1.09 | 1.46  | 0.145        |
| BMI                                                                                                                                         | 0.97                 | 0.90; 1.05 | -0.71 | 0.481        |
| Female                                                                                                                                      | 3.33                 | 1.37; 8.51 | 2.59  | <b>0.010</b> |
| Chronic                                                                                                                                     | 1.69                 | 0.66; 4.51 | 1.075 | 0.283        |
| <b>Abbreviations:</b> BMI, Body mass index; MCIC, minimal clinically important changes<br>Note: Significant p-values are presented in bold. |                      |            |       |              |
